# Supplementary material for: COVID‐19 outbreak in Lombardy: Impact on reducing solid cancer diagnoses in 2020
Source: PubMed Central journal article supplement — Int J Cancer. 2022 Jul 8;151(9):1502–11. doi: 10.1002/ijc.34168 (PMC9350168; doi:10.1002/ijc.34168), 2022-07-08
Supplement: IJC-151-1502-s001.pdf [file IJC-151-1502-s001.pdf]

## Covid-19 outbreak in Lombardy: impact on reducing solid cancer diagnoses in 2020

Annalisa Trama, Alice Bernasconi, Laura Botta, Serena Di Cosimo, Rosalba Miceli, Melanie Claps,

Fabio Badenchini, Roberto Lillini, Massimiliano Rubino, Paolo Lasalvia

### Supplementary

**Supplementary Table S1:** Changes in stage distribution between 2019 and 2020 by major cancer site.

| Cancer site   | Stage            | 2019 |     | 2020 |     |
|---------------|------------------|------|-----|------|-----|
|               |                  | N    | %   | N    | %   |
| Colorectal    | Localised        | 2897 | 50% | 2113 | 47% |
|               | Locally advanced | 1472 | 26% | 1240 | 27% |
|               | Metastatic       | 819  | 14% | 680  | 15% |
|               | Unknown          | 574  | 10% | 492  | 11% |
| Female breast | Localised        | 6362 | 73% | 4924 | 71% |
|               | Locally advanced | 1736 | 20% | 1418 | 21% |
|               | Metastatic       | 224  | 3%  | 215  | 3%  |
|               | Unknown          | 364  | 4%  | 339  | 5%  |
| Lung          | Localised        | 1665 | 30% | 1212 | 27% |
|               | Locally advanced | 1067 | 20% | 875  | 20% |
|               | Metastatic       | 1866 | 34% | 1618 | 36% |
|               | Unknown          | 859  | 16% | 745  | 17% |
| Prostate      | Localised        | 3853 | 75% | 2649 | 73% |
|               | Locally advanced | 350  | 7%  | 274  | 7%  |
|               | Metastatic       | 184  | 4%  | 150  | 4%  |
|               | Unknown          | 751  | 14% | 569  | 16% |
